# Supplementary material
Source: MDPI journal article supplement (https://www.mdpi.com/2073-4352/13/11/1574)
Supplement: s1 [file s1]

## Supplementary Materials

### Single-crystal structure analysis of two novel iron(II) coordination polymers with bridging 1,3,5-tris((1*H*-1,2,4-triazol-1-yl)methyl)benzene

Aysenur Limon <sup>1</sup>, Dustin N. Jordan <sup>1</sup>, Till Strothmann <sup>1</sup>, Laure P. Cuignet <sup>1,2</sup>, Yann Garcia <sup>2</sup>, and Christoph Janiak <sup>\*,1</sup>

<sup>1</sup> *Institut für Anorganische Chemie und Strukturchemie, Heinrich-Heine-Universität, Universitätsstraße 1, 40225 Düsseldorf, Germany*

<sup>2</sup> *Institute of Condensed Matter and Nanosciences, Molecular Chemistry, Materials and Catalysis (IMCN/MOST), Université Catholique de Louvain, 1348 Louvain-la-Neuve, Belgium*

Emails: aysenur.limon@uni-duesseldorf.de, dustin.jordan@uni-duesseldorf.de, till.strothmann@uni-duesseldorf.de, laure.cuignet@sciensano.be, yann.garcia@uclouvain.be, janiak@uni-duesseldorf.de

#### Content

|    |                                                                     |
|----|---------------------------------------------------------------------|
| S1 | Chemicals used                                                      |
| S2 | Ligand analyses                                                     |
| S3 | Infrared spectra of compounds <b>1–3</b>                            |
| S4 | Thermogravimetric analyses of compounds <b>1–3</b>                  |
| S5 | Crystal images of compounds <b>1–3</b>                              |
| S6 | Crystal data of compounds <b>1–3</b>                                |
| S7 | Distortion of the Fe coordination polyhedra of compounds <b>1–3</b> |
| S8 | Photophysical spectra of tmb and compounds <b>1–3</b>               |
| S9 | References                                                          |

## S1 Chemicals used

Table S1. Overview of chemicals used.

| Chemical                                                                             | Supplier        | Purity             |
|--------------------------------------------------------------------------------------|-----------------|--------------------|
| 1,2,4-Triazole                                                                       | BLDpharm        | 97%                |
| 1,3,5-Tris(bromomethyl)benzene                                                       | BLDpharm        | 99.44%             |
| Acetonitrile                                                                         | Riedel-de Haën  | 99.9%              |
| Ascorbic acid                                                                        | Roth            | 99%                |
| Chloroform                                                                           | Fisher          | 99.8%              |
| DSMO-d <sub>6</sub>                                                                  | Sigma-Aldrich   | 99.9%              |
| Ethanol                                                                              | Chemsolute      | 99.9%              |
| Fe(BF <sub>4</sub> ) <sub>2</sub> ·6H <sub>2</sub> O                                 | Merck           | 97%                |
| Fe(ClO <sub>4</sub> ) <sub>2</sub> ·xH <sub>2</sub> O                                | Sigma-Aldrich   | 98%                |
| KOH                                                                                  | Merck           | p.a. <sup>a)</sup> |
| MgSO <sub>4</sub>                                                                    | Fisher Chemical | 99%                |
| (NH <sub>4</sub> ) <sub>2</sub> Fe(SO <sub>4</sub> ) <sub>2</sub> ·6H <sub>2</sub> O | Fluka           | 99%                |
| NH <sub>4</sub> SCN                                                                  | Riedel-de Haën  | 99%                |

<sup>a)</sup> p.a. = pro analysis (purity grade).

## S2 Ligand analyses

To eliminate water signals in the spectrum, samples were dried at 60 °C in vacuo before the analyses.

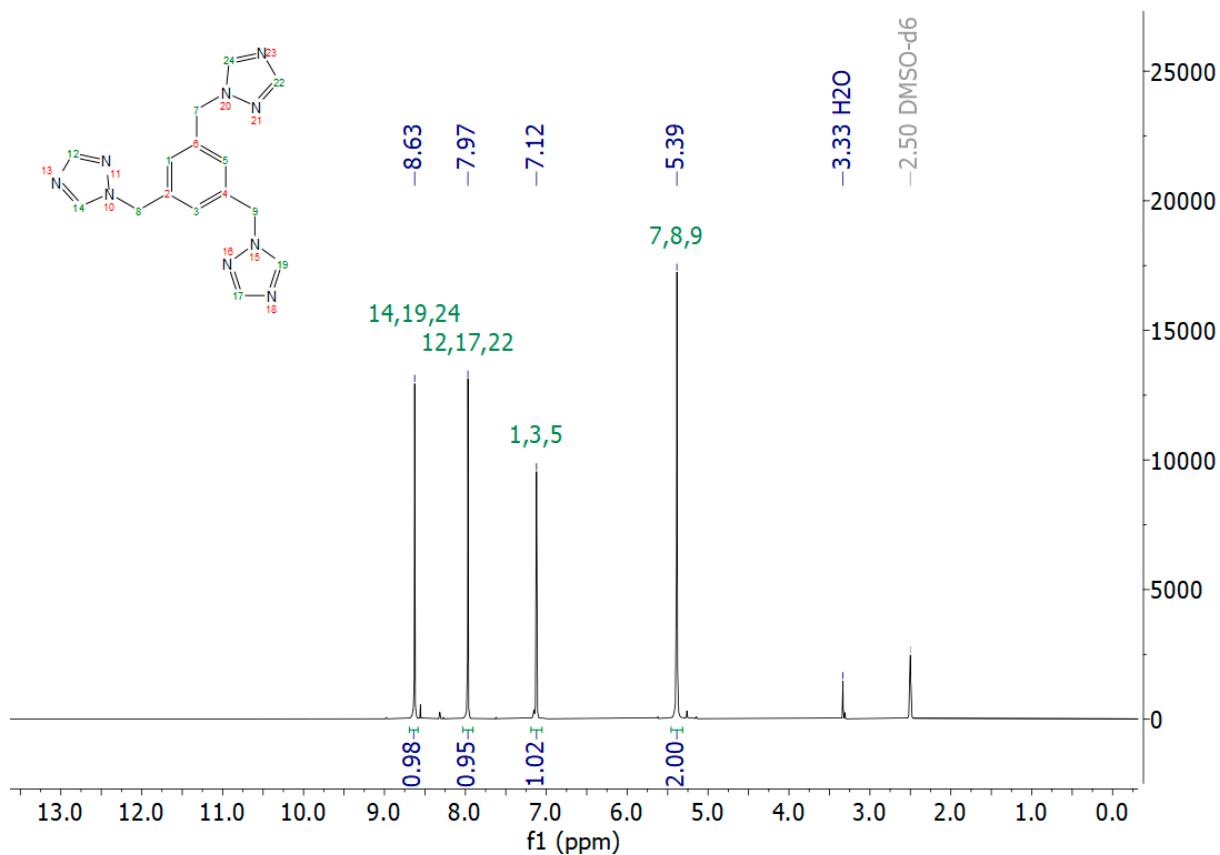

**Figure S1.** <sup>1</sup>H-NMR spectrum (300 MHz, DMSO-d<sub>6</sub>) of ttmb. The water peak of the used DMSO-d<sub>6</sub> is still visible, as it is difficult to avoid the water in the solvent.

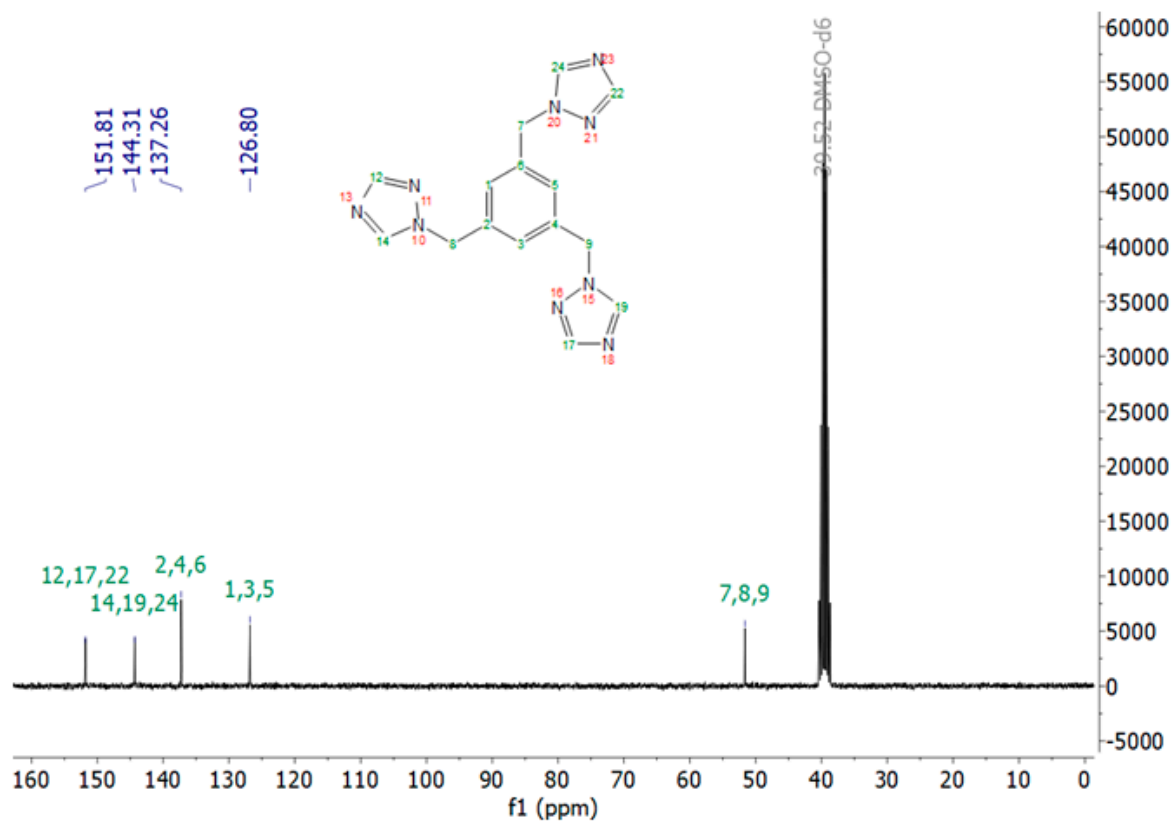

**Figure S2.**  $^{13}\text{C}\{^1\text{H}\}$ -NMR spectrum (75 MHz, DMSO- $d_6$ ) of tmb.

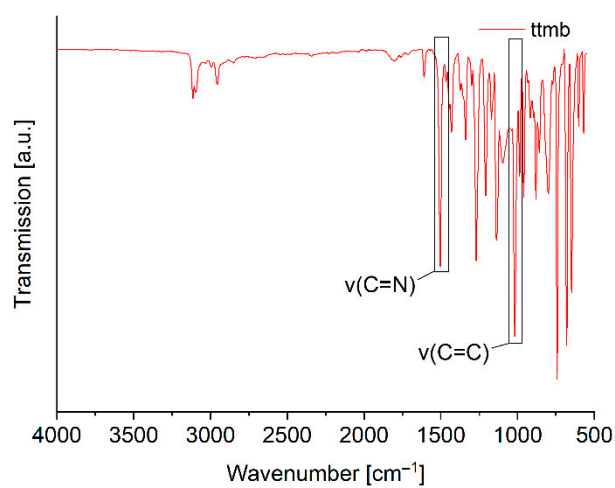

**Figure S3.** IR spectrum of tmb (attenuated total reflection, ATR).

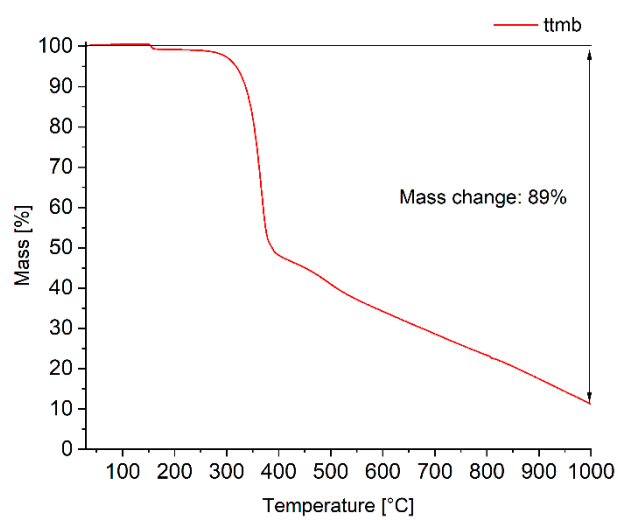

**Figure S4.** TGA of tmb (heating rate 5 K min<sup>-1</sup>).

### S3 Infrared spectra of compounds 1–3

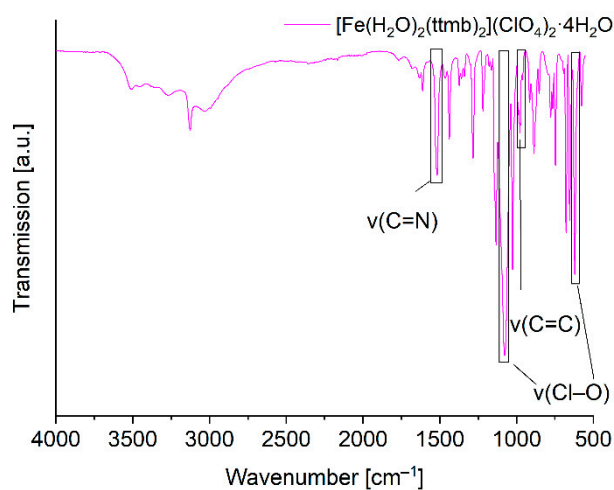

Figure S5. IR spectrum of compound 1 (ATR).

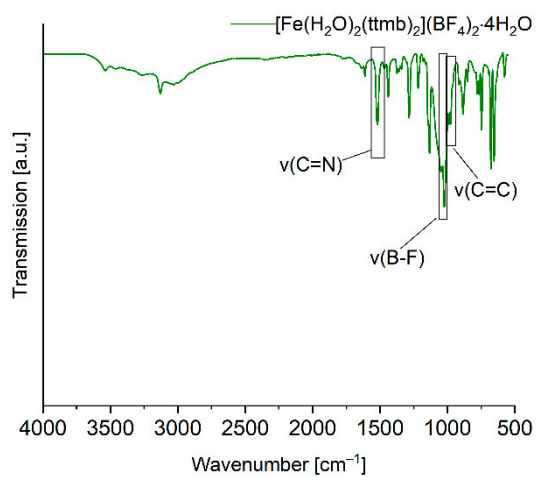

Figure S6. IR spectrum of compound 2 (ATR).

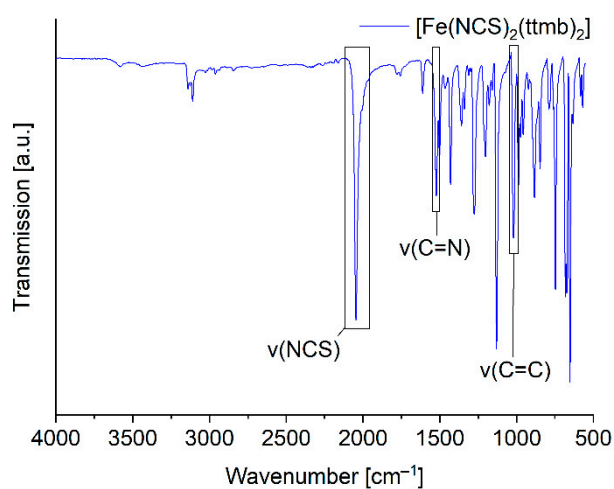

Figure S7. IR spectrum of compound 3 (ATR).

## S4 Thermogravimetric analyses of compounds 1–3

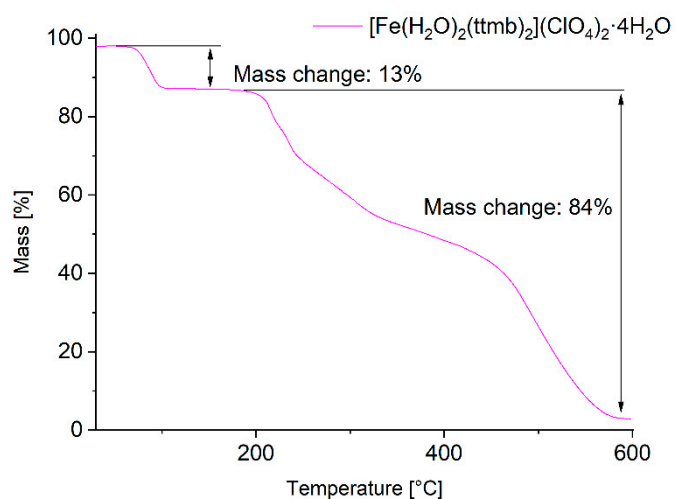

**Figure S8.** TGA of compound **1** (heating rate 5 K min<sup>-1</sup>). Caution! If compound **1** is dried at 60 °C in vacuo before the TGA, an explosion will occur at 200 °C.

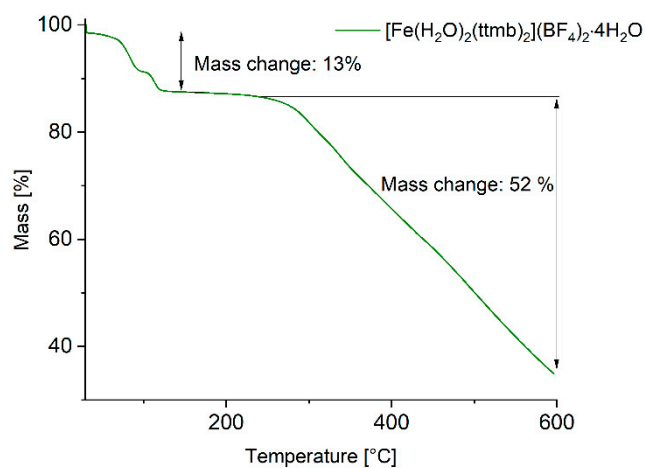

**Figure S9.** TGA of compound **2** (heating rate 5 K min<sup>-1</sup>).

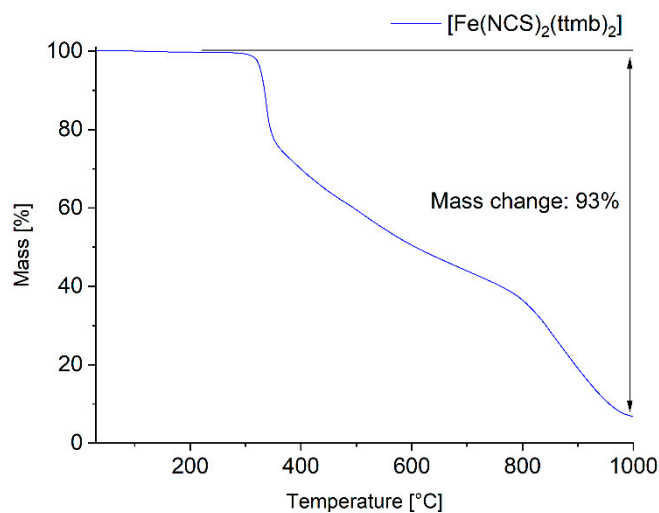

**Figure S10.** TGA of compound **3** (heating rate 5 K min<sup>-1</sup>).

S5      Crystal images of compounds 1–3

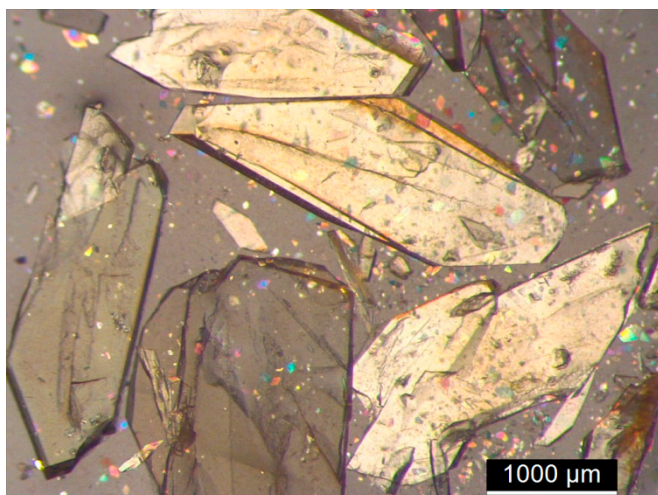

Figure S11. Crystal image of compound 1.

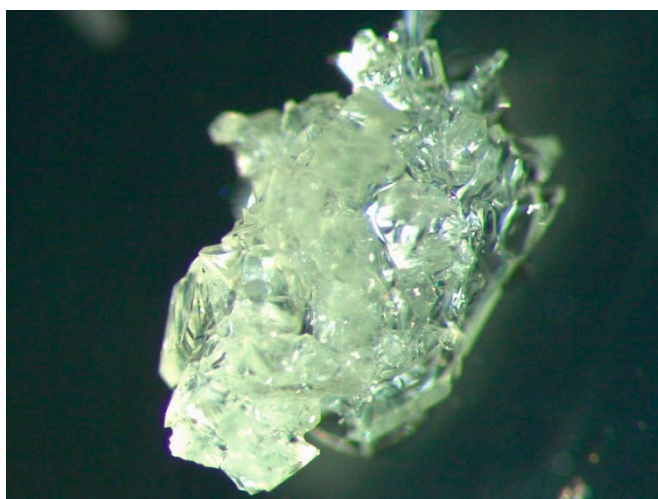

Figure S12. Crystal image of compound 2.

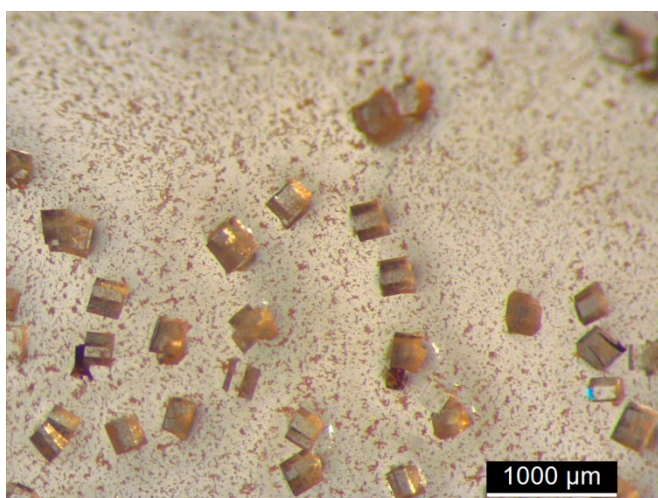

Figure S13. Crystal image of compound 3.



## S6 Crystal data of compounds 1–3

**Table S2.** Crystal data for compounds 1–3.

| Compound                                | 1                                                                                                          | 2                                                                                                         | 3                                                                |
|-----------------------------------------|------------------------------------------------------------------------------------------------------------|-----------------------------------------------------------------------------------------------------------|------------------------------------------------------------------|
| CCDC no.                                | 2297073                                                                                                    | 2297074                                                                                                   | 2297075                                                          |
| Empirical formula                       | C <sub>30</sub> H <sub>34</sub> FeN <sub>18</sub> O <sub>2</sub> ·2(ClO <sub>4</sub> )·4(H <sub>2</sub> O) | C <sub>30</sub> H <sub>34</sub> FeN <sub>18</sub> O <sub>2</sub> ·2(BF <sub>4</sub> )·4(H <sub>2</sub> O) | C <sub>32</sub> H <sub>30</sub> FeN <sub>20</sub> S <sub>2</sub> |
| M <sub>r</sub> [g/mol]                  | 1005.56                                                                                                    | 980.28                                                                                                    | 814.73                                                           |
| Temperature [K]                         | 294                                                                                                        | 273                                                                                                       | 298                                                              |
| Crystal system                          | Monoclinic                                                                                                 | Monoclinic                                                                                                | Triclinic                                                        |
| Space group                             | <i>P</i> 2 <sub>1</sub> / <i>n</i>                                                                         | <i>P</i> 2 <sub>1</sub> / <i>n</i>                                                                        | <i>P</i> $\bar{1}$                                               |
| a [Å]                                   | 8.9918(1)                                                                                                  | 8.9379(8)                                                                                                 | 8.5918(4)                                                        |
| b [Å]                                   | 18.0165(2)                                                                                                 | 17.9291(16)                                                                                               | 9.4947(3)                                                        |
| c [Å]                                   | 13.4614(2)                                                                                                 | 13.4514(13)                                                                                               | 11.7005(3)                                                       |
| α [°]                                   | 90                                                                                                         | 90                                                                                                        | 80.490(2)                                                        |
| β [°]                                   | 91.565(1)                                                                                                  | 91.562(4)                                                                                                 | 85.194(3)                                                        |
| γ [°]                                   | 90                                                                                                         | 90                                                                                                        | 89.497(3)                                                        |
| Volume [Å <sup>3</sup> ]                | 2179.94(5)                                                                                                 | 2154.8                                                                                                    | 938.05                                                           |
| Z                                       | 2                                                                                                          | 2                                                                                                         | 1                                                                |
| Q <sub>calc</sub> [g/cm <sup>3</sup> ]  | 1.532                                                                                                      | 1.511                                                                                                     | 1.442                                                            |
| μ [mm <sup>-1</sup> ]                   | 4.64                                                                                                       | 0.45                                                                                                      | 4.72                                                             |
| F(000)                                  | 1040                                                                                                       | 1008                                                                                                      | 420                                                              |
| Crystal size [mm <sup>3</sup> ]         | 0.37 × 0.19 × 0.08                                                                                         | 0.5 × 0.2 × 0.2                                                                                           | 0.13 × 0.07 × 0.06                                               |
| Wavelength [Å]                          | 1.54184                                                                                                    | 0.71073                                                                                                   | 1.54184                                                          |
| No. of unique reflections               | 3890                                                                                                       | 4915                                                                                                      | 3321                                                             |
| No. of total reflections                | 16794                                                                                                      | 15411                                                                                                     | 10116                                                            |
| R <sub>int</sub>                        | 0.040                                                                                                      | 0.024                                                                                                     | 0.039                                                            |
| R[F <sup>2</sup> > 2σ(F <sup>2</sup> )] | 0.045                                                                                                      | 0.044                                                                                                     | 0.038                                                            |
| wR(F <sup>2</sup> )                     | 0.127                                                                                                      | 0.138                                                                                                     | 0.104                                                            |

**Table S3.** Selected bond lengths and bond angles for compounds 1–3.

| Compound 1                             |            |                                         |            |
|----------------------------------------|------------|-----------------------------------------|------------|
| Bond lengths [Å]                       |            |                                         |            |
| Fe1—O1                                 | 2.0745(19) | Fe1—N1 <sup>i</sup>                     | 2.2014(19) |
| Fe1—O1 <sup>i</sup>                    | 2.0746(19) | Fe1—N7 <sup>ii</sup>                    | 2.227(2)   |
| Fe1—N1                                 | 2.2014(19) | Fe1—N7 <sup>iii</sup>                   | 2.227(2)   |
| Bond angles [°]                        |            |                                         |            |
| O1—Fe1—O1 <sup>i</sup>                 | 180.00(4)  | O1—Fe1—N7 <sup>ii</sup>                 | 91.48(8)   |
| O1 <sup>i</sup> —Fe1—N1                | 93.54(8)   | N1—Fe1—N1 <sup>i</sup>                  | 180.0      |
| O1 <sup>i</sup> —Fe1—N1 <sup>i</sup>   | 86.46(8)   | N1 <sup>i</sup> —Fe1—N7 <sup>ii</sup>   | 93.34(7)   |
| O1—Fe1—N1                              | 86.46(8)   | N1—Fe1—N7 <sup>ii</sup>                 | 86.66(7)   |
| O1—Fe1—N1 <sup>i</sup>                 | 93.54(8)   | N1 <sup>i</sup> —Fe1—N7 <sup>iii</sup>  | 86.66(7)   |
| O1 <sup>i</sup> —Fe1—N7 <sup>ii</sup>  | 88.52(8)   | N1—Fe1—N7 <sup>iii</sup>                | 93.34(7)   |
| O1 <sup>i</sup> —Fe1—N7 <sup>iii</sup> | 91.48(8)   | N7 <sup>ii</sup> —Fe1—N7 <sup>iii</sup> | 180.00(11) |
| O1—Fe1—N7 <sup>iii</sup>               | 88.52(8)   |                                         |            |

Symmetry transformations: i = -x + 1, -y + 1, -z; ii = -x + 1, -y + 1, -z + 1; iii = x, y, z - 1; iv = x, y, z + 1. (v) -x + 2, -y + 1, -z + 1; vi = x - 1/2, -y + 3/2, z - 1/2; vii = -x + 3/2, y - 1/2, -z + 3/2; viii = x + 1, y, z + 1.

|                                        |            |                                         |            |
|----------------------------------------|------------|-----------------------------------------|------------|
| <b>Compound 2</b>                      |            |                                         |            |
| <b>Bond lengths [Å]</b>                |            |                                         |            |
| Fe1—O1 <sup>i</sup>                    | 2.0781(14) | Fe1—N1                                  | 2.1940(15) |
| Fe1—O1                                 | 2.0781(14) | Fe1—N9 <sup>ii</sup>                    | 2.2179(16) |
| Fe1—N1 <sup>i</sup>                    | 2.1940(15) | Fe1—N9 <sup>iii</sup>                   | 2.2179(16) |
| <b>Bond angles [°]</b>                 |            |                                         |            |
| O1 <sup>i</sup> —Fe1—O1                | 180.0      | O1 <sup>i</sup> —Fe1—N9 <sup>ii</sup>   | 91.60(7)   |
| O1—Fe1—N1                              | 93.72(6)   | N1—Fe1—N1 <sup>i</sup>                  | 180.00(8)  |
| O1—Fe1—N1 <sup>i</sup>                 | 86.28(6)   | N1 <sup>i</sup> —Fe1—N9 <sup>ii</sup>   | 93.50(6)   |
| O1 <sup>i</sup> —Fe1—N1                | 86.28(6)   | N1—Fe1—N9 <sup>ii</sup>                 | 86.50(6)   |
| O1 <sup>i</sup> —Fe1—N1 <sup>i</sup>   | 93.72(6)   | N1—Fe1—N9 <sup>iii</sup>                | 93.50(6)   |
| O1—Fe1—N9 <sup>ii</sup>                | 88.40(6)   | N1 <sup>i</sup> —Fe1—N9 <sup>iii</sup>  | 86.50(6)   |
| O1—Fe1—N9 <sup>iii</sup>               | 91.60(7)   | N9 <sup>ii</sup> —Fe1—N9 <sup>iii</sup> | 180.0      |
| O1 <sup>i</sup> —Fe1—N9 <sup>iii</sup> | 88.40(6)   |                                         |            |

Symmetry transformations: i = -x + 2, -y + 1, -z + 2; ii = -x + 2, -y + 1, -z + 1; iii = x, y, z + 1; iv = x, y, z - 1; v = -x + 1, -y + 1, -z + 1; vi = -x + 3/2, y + 1/2, -z + 3/2.

|                                         |            |                                         |            |
|-----------------------------------------|------------|-----------------------------------------|------------|
| <b>Compound 3</b>                       |            |                                         |            |
| <b>Bond lengths [Å]</b>                 |            |                                         |            |
| Fe1—N1 <sup>i</sup>                     | 2.1813(17) | Fe1—N7 <sup>iii</sup>                   | 2.2150(17) |
| Fe1—N1                                  | 2.1813(17) | Fe1—N10                                 | 2.143(2)   |
| Fe1—N7 <sup>ii</sup>                    | 2.2150(17) | Fe1—N10 <sup>i</sup>                    | 2.143(2)   |
| <b>Bond angles [°]</b>                  |            |                                         |            |
| N1 <sup>i</sup> —Fe1—N1                 | 180.0      | N10 <sup>i</sup> —Fe1—N1 <sup>i</sup>   | 90.09(7)   |
| N1—Fe1—N7 <sup>ii</sup>                 | 95.59(6)   | N10—Fe1—N1                              | 90.09(7)   |
| N1 <sup>i</sup> —Fe1—N7 <sup>iii</sup>  | 95.59(6)   | N10—Fe1—N7 <sup>ii</sup>                | 89.32(7)   |
| N1—Fe1—N7 <sup>iii</sup>                | 84.41(6)   | N10 <sup>i</sup> —Fe1—N7 <sup>iii</sup> | 89.32(7)   |
| N1 <sup>i</sup> —Fe1—N7 <sup>ii</sup>   | 84.41(6)   | N10 <sup>i</sup> —Fe1—N7 <sup>ii</sup>  | 90.68(7)   |
| N7 <sup>ii</sup> —Fe1—N7 <sup>iii</sup> | 180.00(9)  | N10—Fe1—N7 <sup>iii</sup>               | 90.68(7)   |
| N10—Fe1—N1 <sup>i</sup>                 | 89.91(7)   | N10—Fe1—N10 <sup>i</sup>                | 180.0      |
| N10 <sup>i</sup> —Fe1—N1                | 89.91 (7)  |                                         |            |

Symmetry transformations: i = -x + 1, -y + 2, -z; ii = x, y + 1, z - 1; iii = -x + 1, -y + 1, -z + 1; iv = x, y - 1, z + 1; v = -x, -y + 1, -z + 1; vi = x, y - 1, z.

**Table S4.** Hydrogen-bond geometry for compounds 1–3.

|                               |                 |                   |                           |                             |
|-------------------------------|-----------------|-------------------|---------------------------|-----------------------------|
| <b>Compound 1</b>             |                 |                   |                           |                             |
| <i>D</i> —H... <i>A</i>       | <i>D</i> —H [Å] | H... <i>A</i> [Å] | <i>D</i> ... <i>A</i> [Å] | <i>D</i> —H... <i>A</i> [°] |
| C1—H1...N8 <sup>v</sup>       | 0.93            | 2.50              | 3.346 (3)                 | 151                         |
| C2—H2...O6 <sup>vi</sup>      | 0.93            | 2.44              | 3.264 (4)                 | 148                         |
| C10—H10A...N2 <sup>ii</sup>   | 0.97            | 2.65              | 3.572 (4)                 | 158                         |
| C12—H12...O6 <sup>vii</sup>   | 0.87 (4)        | 2.51 (4)          | 3.279 (5)                 | 148 (4)                     |
| C13—H13A...O2 <sup>viii</sup> | 0.97            | 2.59              | 3.436 (4)                 | 145                         |
| C15—H15...O7                  | 0.93            | 2.54              | 3.386 (5)                 | 152                         |
| O1—H1A...O2                   | 0.75 (5)        | 1.90 (5)          | 2.643 (3)                 | 176 (5)                     |
| O1—H1B...N4 <sup>ix</sup>     | 0.86 (5)        | 1.95 (5)          | 2.785 (3)                 | 165 (4)                     |
| O2—H2A...N5 <sup>i</sup>      | 1.03 (7)        | 2.31 (7)          | 2.904 (3)                 | 116 (5)                     |

|                            |           |          |           |         |
|----------------------------|-----------|----------|-----------|---------|
| O2—H2A···O7 <sup>iii</sup> | 1.03 (7)  | 2.50 (7) | 3.435 (6) | 151 (5) |
| O2—H2B···O3                | 0.91 (3)  | 1.87 (2) | 2.745 (4) | 159 (5) |
| O3—H3C···N2 <sup>vi</sup>  | 0.95 (2)  | 2.17 (6) | 3.020 (4) | 148 (8) |
| O3—H3D···O5 <sup>vi</sup>  | 1.03 (10) | 2.48 (8) | 3.423 (7) | 152 (7) |

Symmetry transformations: ii =  $-x + 1, -y + 1, -z + 1$ ; v =  $-x + 2, -y + 1, -z + 1$ ; vi =  $x - 1/2, -y + 3/2, z - 1/2$ ; vii =  $-x + 3/2, y - 1/2, -z + 3/2$ ; viii =  $x + 1, y, z + 1$ ; ix =  $-x + 3/2, y + 1/2, -z + 1/2$ .

### Compound 2

| <i>D</i> —H··· <i>A</i>     | <i>D</i> —H [Å] | H··· <i>A</i> [Å] | <i>D</i> ··· <i>A</i> [Å] | <i>D</i> —H··· <i>A</i> [°] |
|-----------------------------|-----------------|-------------------|---------------------------|-----------------------------|
| C1—H1···F4B <sup>i</sup>    | 0.93            | 2.50              | 3.218(7)                  | 134                         |
| C1—H1···F4A <sup>i</sup>    | 0.93            | 2.47              | 3.308(8)                  | 151                         |
| C2—H2···N8 <sup>v</sup>     | 0.93            | 2.49              | 3.329(3)                  | 151                         |
| C10—H10A···N3 <sup>ii</sup> | 0.97            | 2.61              | 3.537(3)                  | 161                         |
| C12—H12···F4B <sup>iv</sup> | 0.93            | 2.45              | 3.362(9)                  | 167                         |
| C12—H12···F2A <sup>iv</sup> | 0.93            | 2.55              | 3.290(9)                  | 136                         |
| C12—H12···F4A <sup>iv</sup> | 0.93            | 2.40              | 3.196(6)                  | 144                         |
| C13—H13A···O2 <sup>v</sup>  | 0.97            | 2.58              | 3.419(3)                  | 145                         |
| C14—H14···F2B <sup>vi</sup> | 0.93            | 2.46              | 3.243(8)                  | 142                         |
| C14—H14···F2A <sup>vi</sup> | 0.93            | 2.51              | 3.357(10)                 | 152                         |
| O2—H2A···N5                 | 0.85            | 2.32              | 2.895(27)                 | 125                         |
| O3—H3C···N3                 | 0.85            | 2.36              | 3.025(34)                 | 136                         |
| O1—H1A···O2                 | 0.85            | 1.78              | 2.626(27)                 | 177                         |
| O2—H2B···O3                 | 0.85            | 1.88              | 2.723(40)                 | 170                         |

Symmetry transformations: i =  $-x + 2, -y + 1, -z + 2$ ; ii =  $-x + 2, -y + 1, -z + 1$ ; iv =  $x, y, z - 1$ ; v =  $-x + 1, -y + 1, -z + 1$ ; vi =  $-x + 3/2, y + 1/2, -z + 3/2$ .

### Compound 3

| <i>D</i> —H··· <i>A</i>     | <i>D</i> —H [Å] | H··· <i>A</i> [Å] | <i>D</i> ··· <i>A</i> [Å] | <i>D</i> —H··· <i>A</i> [°] |
|-----------------------------|-----------------|-------------------|---------------------------|-----------------------------|
| C2—H2···N8 <sup>v</sup>     | 0.93            | 2.45              | 3.256 (3)                 | 146                         |
| C9—H9···N5 <sup>v</sup>     | 0.93            | 2.67              | 3.500 (3)                 | 149                         |
| C12—H12···N2 <sup>iii</sup> | 0.93            | 2.64              | 3.484 (4)                 | 152                         |
| C13—H13B···S1 <sup>vi</sup> | 0.97            | 2.75              | 3.668 (2)                 | 157                         |
| C15—H15···S1 <sup>iii</sup> | 0.93            | 2.98              | 3.877 (2)                 | 163                         |

Symmetry transformations: iii =  $-x + 1, -y + 1, -z + 1$ ; v =  $-x, -y + 1, -z + 1$ ; vi =  $x, y - 1, z$ .

## S7 Distortion of the Fe coordination polyhedra of compounds 1–3

The indices for distortion were calculated using OctaDist software [1]. The distortion parameters were calculated as follows:

$\zeta$  parameter [2]:  $\zeta = \sum_{i=1}^6 |d_i - d_{mean}|$

$d_i$ : individual M–L bond distance

$d_{mean}$ : mean metal-ligand bond distance

$\Sigma$  parameter [3]:  $\Sigma = \sum_{i=1}^{12} |90 - \phi_i|$

$\phi_i$ : individual cis angle

$\theta$  parameter [4]:  $\theta = \sum_{i=1}^{24} |60 - \theta_i|$

$\theta_i$ : individual angle between two vectors of two twisting face

These parameters are zero for a perfect octahedron.

The values  $\Sigma$  and  $\theta$  are derived by summation over the absolute values of all 12 differences  $90 - \phi_i$  and 24 differences  $60 - \theta_i$ , respectively, in the octahedron. The angles  $\phi_i$  and  $\theta_i$  are  $90^\circ$  and  $60^\circ$ , respectively, giving the parameters  $\Sigma$  and  $\theta$  as zero for a perfect octahedron [1]. However, a very small deviation in  $\phi_i$  and  $\theta_i$  by only  $1^\circ$  will already result in  $\Sigma = 12^\circ$  and  $\theta = 24^\circ$ .

The Fe(II) atoms in compounds **1–3** are in a somewhat distorted coordination environment [5] (Table S5).

**Table S5.** Mean M–L distance and values for distortion indices of the metal atom coordination environment in compounds **1–3**.

| Compound | M   | Mean distance<br><D> [Å] | Distance distortion<br>$\zeta$ [Å] | Angle distortion<br>$\Sigma$ [°] | Torsional distortion<br>$\theta$ [°] |
|----------|-----|--------------------------|------------------------------------|----------------------------------|--------------------------------------|
| <b>1</b> | Fe1 | 2.17                     | 0.37                               | 33.47                            | 89.64                                |
| <b>2</b> | Fe1 | 2.16                     | 0.34                               | 35.27                            | 93.84                                |
| <b>3</b> | Fe1 | 2.18                     | 0.15                               | 25.52                            | 103.91                               |

## S8 Photophysical spectra of ttmb and compounds 1–3

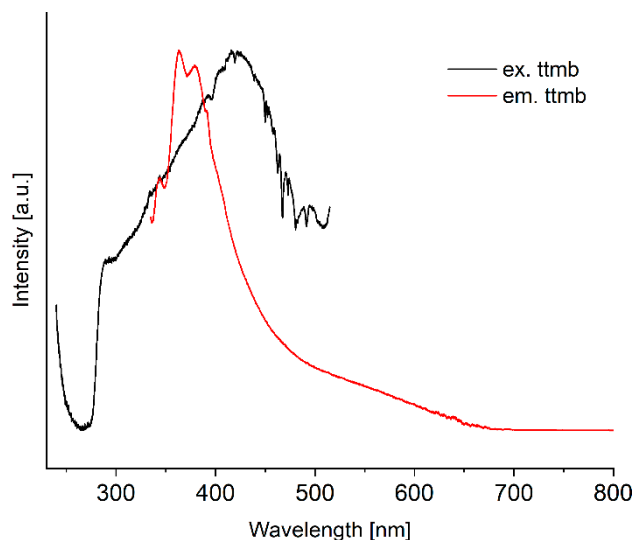

**Figure S14.** Excitation ( $\lambda_{\text{em}} = 550 \text{ nm}$ ) and emission spectra ( $\lambda_{\text{exc}} = 320 \text{ nm}$ ) of solid-phase ttmb at  $T = 293 \text{ K}$ .

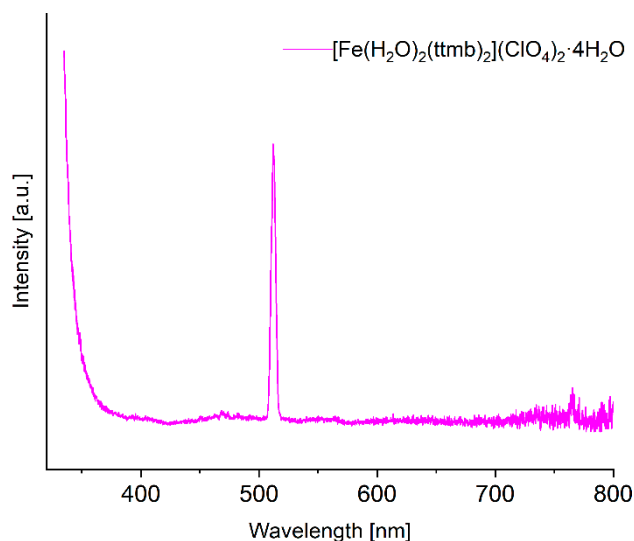

**Figure S15.** Emission spectrum ( $\lambda_{\text{exc}} = 320 \text{ nm}$ ) of solid-phase compound **1** at  $T = 293 \text{ K}$ . The sharp peak at  $512 \text{ nm}$  is due to the xenon lamp.

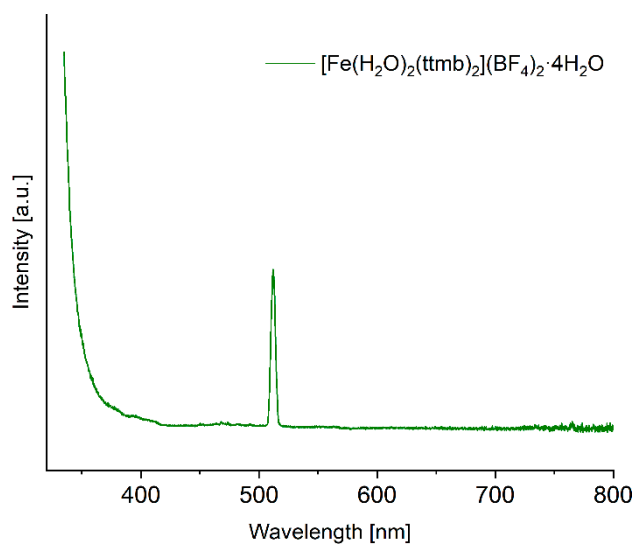

**Figure S16.** Emission spectrum ( $\lambda_{\text{exc}} = 320 \text{ nm}$ ) of solid-phase compound **2** at  $T = 293 \text{ K}$ . The sharp peak at  $512 \text{ nm}$  is due to the xenon lamp.

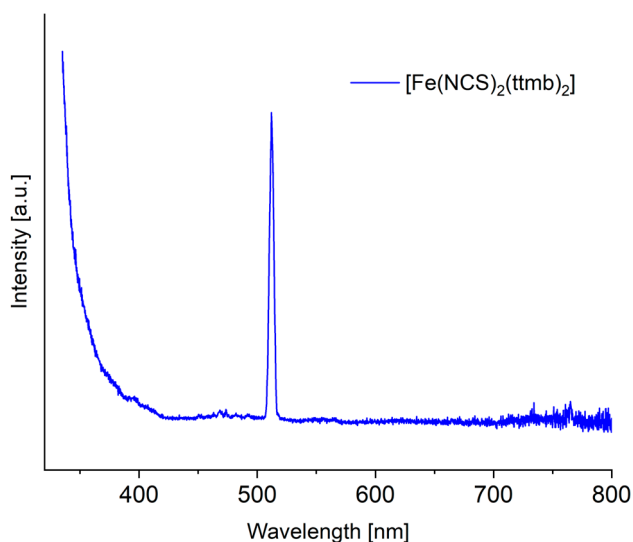

**Figure S17.** Emission spectrum ( $\lambda_{\text{exc}} = 320$  nm) of solid-phase compound **3** at  $T = 293$  K. The sharp peak at 512 nm is due to the xenon lamp.

## S9 References

1. Ketkaew, R.; Tantirungrotechai, Y.; Harding, P.; Chastanet, G.; Guionneau, P.; Marchivie, M.; Harding, D.J. OctaDist: a tool for calculating distortion parameters in spin crossover and coordination complexes. *Dalton Trans.* **2021**, 50, 1086–1096. <https://doi.org/10.1039/d0dt03988h>.
2. Buron-Le Cointe, M.; Hébert, J.; Baldé, C.; Moisan, N.; Toupet, L.; Guionneau, P.; Létard, J.F.; Freysz, E.; Cailleau, H.; Collet, E. Intermolecular control of thermoswitching and photoswitching phenomena in two spin-crossover polymorphs. *Phys. Rev. B* **2012**, 85, 064114. <https://doi.org/10.1103/PhysRevB.85.064114>.
3. McCusker, J.K.; Rheingold, A.L.; Hendrickson, D.N. Variable-Temperature Studies of Laser-Initiated  $^5\text{T}_2 \rightarrow ^1\text{A}_1$  Intersystem Crossing in Spin-Crossover Complexes: Empirical Correlations between Activation Parameters and Ligand Structure in a Series of Polypyridyl Ferrous Complexes. *Inorg. Chem.* **1996**, 35, 2100–2112. <https://doi.org/10.1021/ic9507880>.
4. Marchivie, M.; Guionneau, P.; Létard, J.F.; Chasseau, D. Photo-induced spin-transition: the role of the iron(II) environment distortion. *Acta Crystallogr. B* **2005**, 61, 25–28. <https://doi.org/10.1107/S0108768104029751>.
5. Avila, Y.; Pérez, O.; Sánchez, L.; Vázquez, M.C.; Mojica, R.; González, M.; Ávila, M.; Rodríguez-Hernández, J.; Reguera, E. Spin crossover in Hofmann-like coordination polymers. Effect of the axial ligand substituent and its position. *New J. Chem.* **2023**, 47, 10781–10795. <https://doi.org/10.1039/D3NJ01498C>.
